# Supplementary material for: Four new metal–organic frameworks constructed from H2DBTDC-O2 (H2DBTDC-O2 = dibenzothiophene-5,5′-dioxide-3,7-dicarboxylic acid) ligand with guest-responsive photoluminescence
Source: Royal Society of Chemistry journal article supplement (doi:10.1039/c0ce00422g), 2010-11-30
Supplement: c0ce00422g.pdf [file c0ce00422g.pdf]

Electronic Supplementary Material (ESI) for *CrystEngComm*

## Supporting Information

**Four new metal-organic frameworks constructed from H<sub>2</sub>DBTDC-O<sub>2</sub>  
(H<sub>2</sub>DBTDC-O<sub>2</sub> = Dibenzothiophene-5,5'-dioxide-3,7-dicarboxylic  
acid) ligand with guest-responsive photoluminescence**

Shunshun Xiong, Sujing Wang, Xinjun Tang and Zhiyong Wang\*

Hefei National Laboratory for Physical Science at Microscale, CAS Key  
Laboratory of Soft Matter Chemistry and Department of Chemistry  
University of Science and Technology of China  
Hefei, 230026 (P. R. China)  
Fax: (+86) 551-360-3185  
E-mail: zwang3@ustc.edu.cn

### Contents:

- Part 1: Crystal Data and structure Refinement Parameters for Complexes 1-4.**
- Part 2: Selected bond lengths and bond angles of compounds 1-4.**
- Part 3: Supplementary description of the structure for compound 1, 3 and 4.**
- Part 4: Powder X-ray Diffraction (PXRD) for compound 2, 3, 4; PXRD for samples 2a, 2b, 2a soaked in chloroform, cyclohexane and toluene.**
- Part 5: Optical Microscope Images of Compound 1 Crystals.**
- Part 6: Semilogarithmic emission decay plots of the free H<sub>2</sub>L ligand and compound 1-4.**

Table S1. Crystal Data and structure Refinement Parameters for Complexes 1-4.

|                                           | 1                                                                  | 2                                                                                             | 3                                                                 | 4                                                                 |
|-------------------------------------------|--------------------------------------------------------------------|-----------------------------------------------------------------------------------------------|-------------------------------------------------------------------|-------------------------------------------------------------------|
| Formula                                   | C <sub>24</sub> H <sub>16</sub> Cd N <sub>2</sub> O <sub>6</sub> S | C <sub>38</sub> H <sub>20</sub> N <sub>2</sub> O <sub>12</sub> S <sub>2</sub> Zn <sub>2</sub> | C <sub>24</sub> H <sub>20</sub> N <sub>4</sub> O <sub>6</sub> SZn | C <sub>24</sub> H <sub>14</sub> CoN <sub>2</sub> O <sub>6</sub> S |
| Mr                                        | 572.85                                                             | 891.42                                                                                        | 557.87                                                            | 517.36                                                            |
| T (K)                                     | 180                                                                | 180                                                                                           | 180                                                               | 180                                                               |
| Radiation,<br>wavelength (Å)              | Cu Kα, 1.54184                                                     | Cu Kα, 1.54184                                                                                | Mo Kα, 0.71073                                                    | Mo Kα, 0.71073                                                    |
| crystal System                            | monoclinic                                                         | monoclinic                                                                                    | orthorhombic                                                      | triclinic                                                         |
| space group                               | <i>C2/c</i>                                                        | <i>P2<sub>1</sub>/c</i>                                                                       | <i>Pbcm</i>                                                       | <i>P-1</i>                                                        |
| a [Å]                                     | 18.5317(8)                                                         | 13.9610(7)                                                                                    | 10.1489(7)                                                        | 7.2086(4)                                                         |
| b [Å]                                     | 16.6605(6)                                                         | 22.649(2)                                                                                     | 22.0518(12)                                                       | 12.3243(7)                                                        |
| c [Å]                                     | 22.9353(7)                                                         | 19.601(3)                                                                                     | 14.1837(9)                                                        | 13.8591(9)                                                        |
| V [Å <sup>3</sup> ]                       | 7061.4(5)                                                          | 6076.2(11)                                                                                    | 3171.2(3)                                                         | 1138.89(12)                                                       |
| Z                                         | 8                                                                  | 4                                                                                             | 4                                                                 | 2                                                                 |
| ρ <sub>calcd</sub> [g cm <sup>-3</sup> ]  | 1.078                                                              | 0.974                                                                                         | 1.168                                                             | 1.509                                                             |
| F(000)                                    | 2288                                                               | 1800                                                                                          | 1144                                                              | 526                                                               |
| θ range /°                                | 3.57-62.63                                                         | 3.02-62.93                                                                                    | 2.64-26.02                                                        | 2.76-26.02                                                        |
| Reflns collected                          | 15212                                                              | 43382                                                                                         | 21639                                                             | 8446                                                              |
| Independent reflns                        | 5547                                                               | 9633                                                                                          | 3262                                                              | 4464                                                              |
| Goodness-of-fit                           | 1.011                                                              | 0.979                                                                                         | 1.011                                                             | 0.996                                                             |
| R <sub>1</sub> <sup>a</sup> (I > 2σ (I))  | 0.0459                                                             | 0.0661                                                                                        | 0.0523                                                            | 0.0405                                                            |
| wR <sub>2</sub> <sup>b</sup> (I > 2σ (I)) | 0.1147                                                             | 0.1138                                                                                        | 0.1463                                                            | 0.0875                                                            |

$$aR1 = \frac{\sum ||F_o| - |F_c||}{\sum |F_o|}, bwR2 = \frac{[\sum [w(F_o^2 - F_c^2)^2]]}{\sum w(F_o^2)^2}]^{1/2}.$$

Table S2. Selected bond lengths (Å) and bond angles (°) of compounds 1-4

1

|             |             |            |             |
|-------------|-------------|------------|-------------|
| Cd1 – O1    | 2.420 (3)   | Cd1 – O6B  | 2.638 (3)   |
| Cd1 – O2    | 2.386 (3)   | Cd1 – N1   | 2.301 (4)   |
| Cd1 – O5A   | 2.338 (3)   | Cd1 – N2   | 2.278 (5)   |
| Cd1 – O6A   | 2.637 (3)   |            |             |
| O5A Cd1 O6A | 51.891 (17) | N2 Cd1 O2  | 92.849 (16) |
| O5A Cd1 O2  | 85.325 (12) | N1 Cd1 O5A | 94.078 (14) |
| O6B Cd1 O1  | 92.420 (12) | N2 Cd1 O5A | 88.622 (17) |
| O6B Cd1 O6A | 75.851 (12) | N1 Cd1 O6B | 88.639 (15) |
| O2 Cd1 O1   | 54.775 (12) | N1 Cd1 O6A | 88.193 (12) |
| N1 Cd1 O1   | 87.539 (13) | N2 Cd1 O6B | 87.876 (18) |
| N2 Cd1 O1   | 91.881 (15) | N2 Cd1 O6A | 91.659 (15) |
| N1 Cd1 O2   | 89.687 (14) |            |             |

2

|             |              |              |             |
|-------------|--------------|--------------|-------------|
| Zn1 – O8    | 2.258 (5)    | Zn2 – O12A   | 2.054 (9)   |
| Zn1 – O2    | 2.044 (1)    | Zn2 – O7     | 1.991 (4)   |
| Zn1 – O6A   | 2.022 (1)    | Zn2 – O1     | 2.030 (4)   |
| Zn1 – O11A  | 2.005 (7)    | Zn2 – O5A    | 1.998 (1)   |
| Zn1 – N2    | 2.047 (4)    | Zn2 – N1     | 2.026 (2)   |
| N1 Zn2 O1   | 105.903 (22) | O1 Zn2 O7    | 88.986 (19) |
| N1 Zn2 O5A  | 98.881 (24)  | O1 Zn2 O5A   | 88.707 (21) |
| N1 Zn2 O7   | 100.154 (22) | O12A Zn2 O7  | 85.549 (19) |
| N1 Zn2 O12A | 97.149 (24)  | O12A Zn2 O5A | 88.082 (21) |
| N2 Zn1 O2   | 93.696 (22)  | O2 Zn1 O8    | 88.020 (21) |
| N2 Zn1 O6A  | 102.528 (21) | O2 Zn1 O6A   | 86.435 (21) |
| N2 Zn1 O11A | 103.884 (22) | O11 Zn1 O6A  | 89.788 (21) |
| N2 Zn1 O8   | 98.997 (21)  | O11A Zn1 O8  | 89.129 (21) |

3

|            |              |             |              |
|------------|--------------|-------------|--------------|
| Zn1 – O1   | 1.937 (1)    | Zn1 – N1    | 1.967 (2)    |
| Zn1 – O3B  | 1.941 (1)    | Zn1 – N1B   | 1.957 (2)    |
| O1 Zn1 O3B | 93.355 (90)  | O3B Zn1 N1  | 110.582 (59) |
| O1 Zn1 N1D | 113.402 (59) | O3B Zn1 N1D | 110.582 (59) |
| O1 Zn1 N1  | 113.402 (59) | N1 Zn1 N1D  | 113.741 (87) |

4

|             |             |             |              |
|-------------|-------------|-------------|--------------|
| O2 – Co1    | 2.038 (4)   | N1 – Co1    | 2.108 (2)    |
| O1 – Co1    | 2.108 (2)   | O4A – Co1   | 2.202 (8)    |
| N2 – Co1    | 2.104 (2)   | O3A – Co1   | 2.193 (5)    |
| <br>        |             |             |              |
| O1A Co1 O3A | 90.424 (80) | N1 Co1 O3A  | 98.916 (83)  |
| O1A Co1 O4A | 97.362 (81) | N1 Co1 O2   | 84.326 (86)  |
| O1A Co1 N2  | 93.646 (87) | O3A Co1 O4A | 59.478 (75)  |
| O1A Co1 O2  | 94.449 (83) | O4A Co1 N2  | 88.408 (87)  |
| N1 Co1 N2   | 77.295 (92) | O2 Co1 O3A  | 110.614 (79) |
| N1 Co1 O4A  | 85.645 (84) | O2 Co1 N2   | 100.815 (95) |

Symmetry transformations used to generate equivalent atoms: for **1**: A)  $1/2+x, 1/2-y, 1/2+z$ ; B)  $1/2-x, 1/2+y, 1/2-z$ ; for **2**: A)  $x, 1/2-y, 1/2+z$ ; for **3**: A)  $-x, -y, 1/2+z$ ; B)  $-x, 1/2+y, 1/2-z$ ; C)  $-x, -y, -z$ ; D)  $x, y, 1/2-z$ ; E)  $-x, 1/2+y, z$ ; for **4**: A)  $-x, -y, -z$ .

### Supplementary description of the structure for compound **1** and **4**.

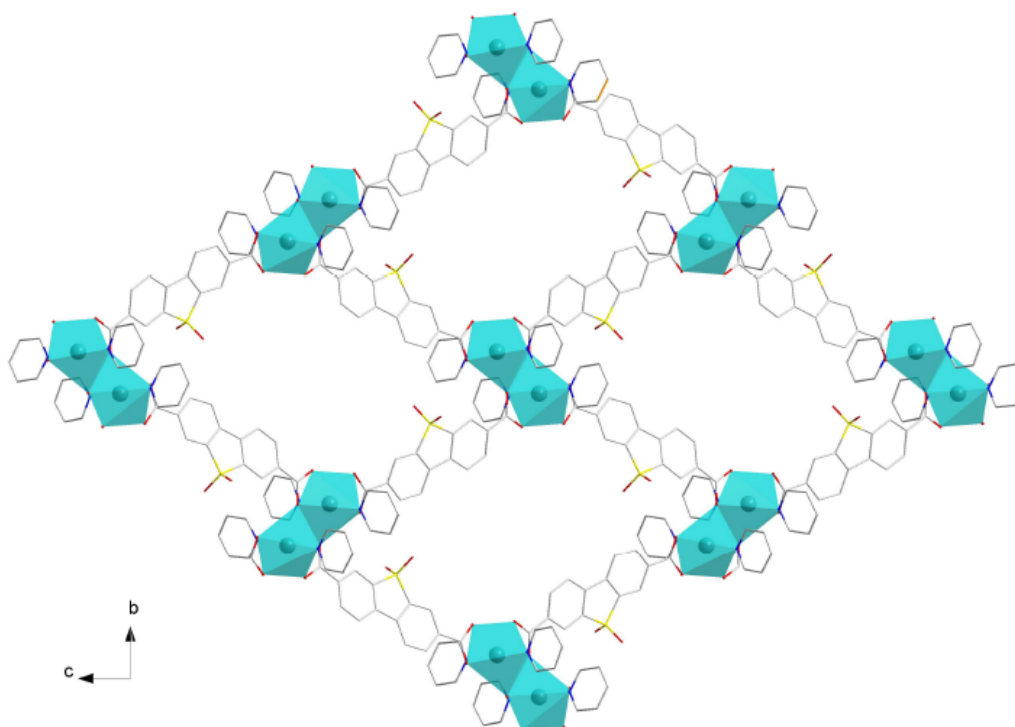

Figure S1. The four-connected dinuclear SBUs in compound **1** interlink each other to afford 2D single layer, which exhibits large rhombic grids viewed along the c-axis.

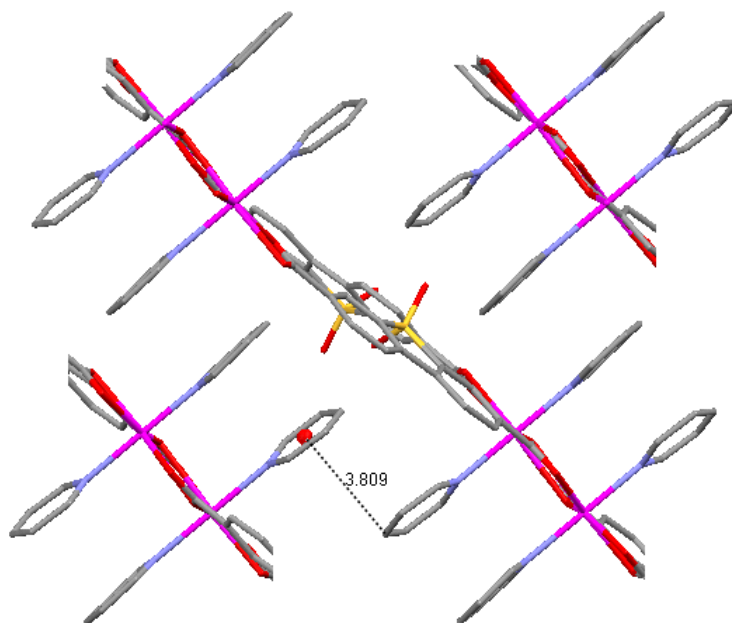

Figure S2. The 2D sheets of compound **1** accumulate in ABAB type and exhibit  $\pi$ - $\pi$  stacking interaction between the pyridine moieties.

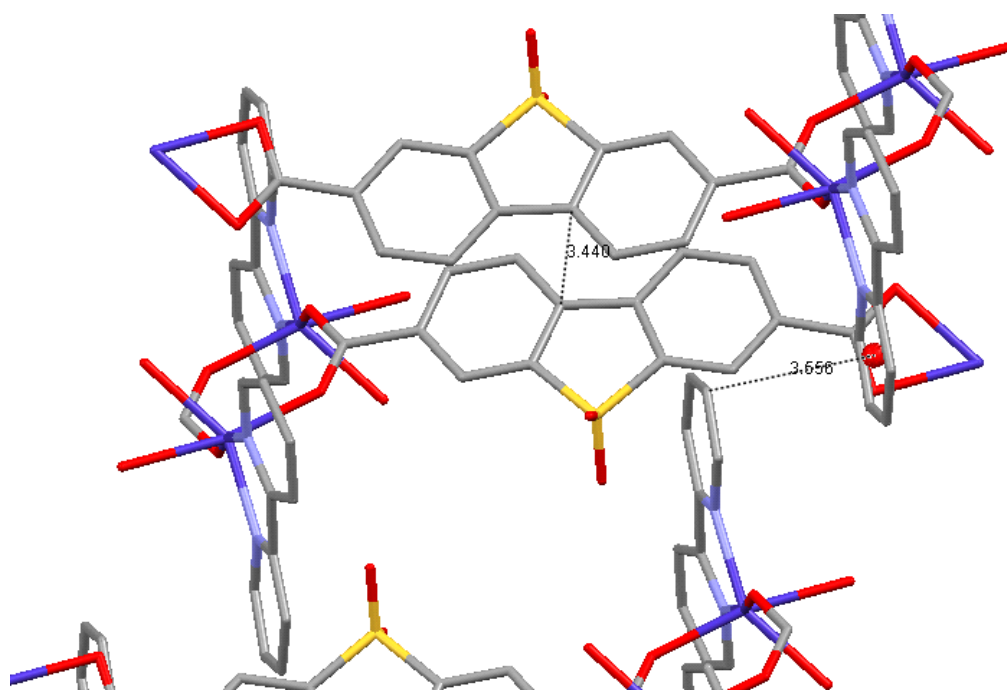

Figure S3. Intermolecular  $\pi$ - $\pi$  stacking interactions of both  $L^{2-}$  -  $L^{2-}$  and 2,2'-bipy - 2,2'-bipy molecules in compound **4**.

**Powder X-ray Diffraction (PXRD) for compound 2, 3 and 4.**

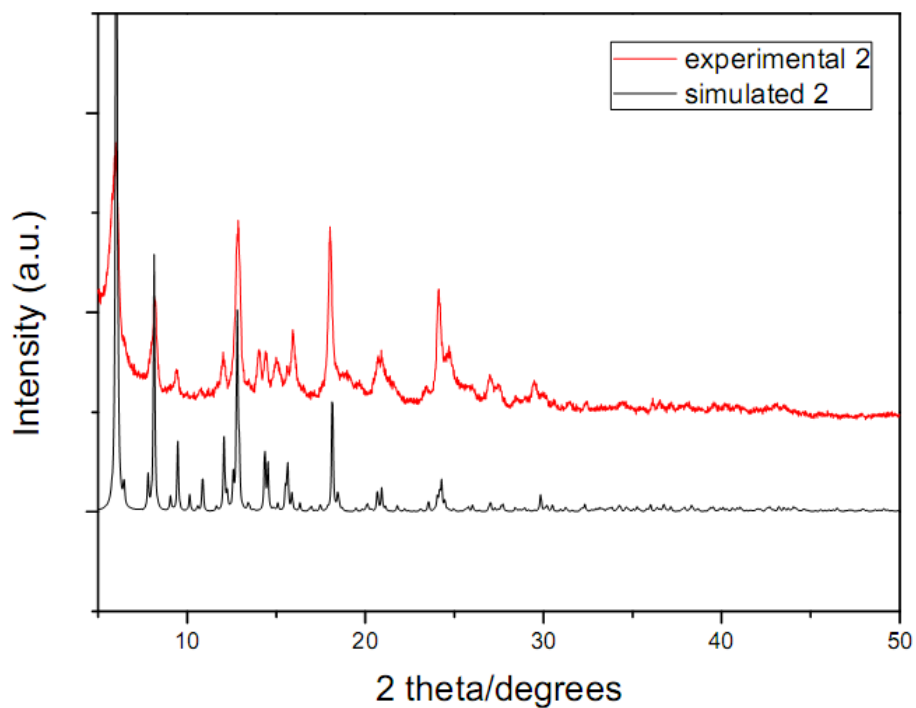

Figure S4. PXR D analysis for compound 2

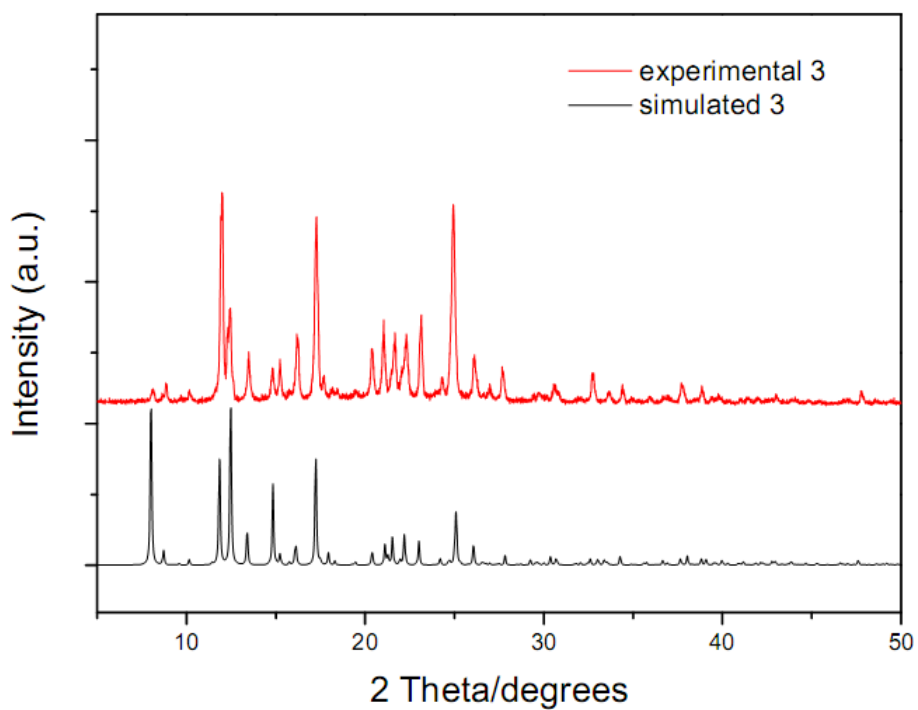

Figure S5. PXR D analysis for compound 3

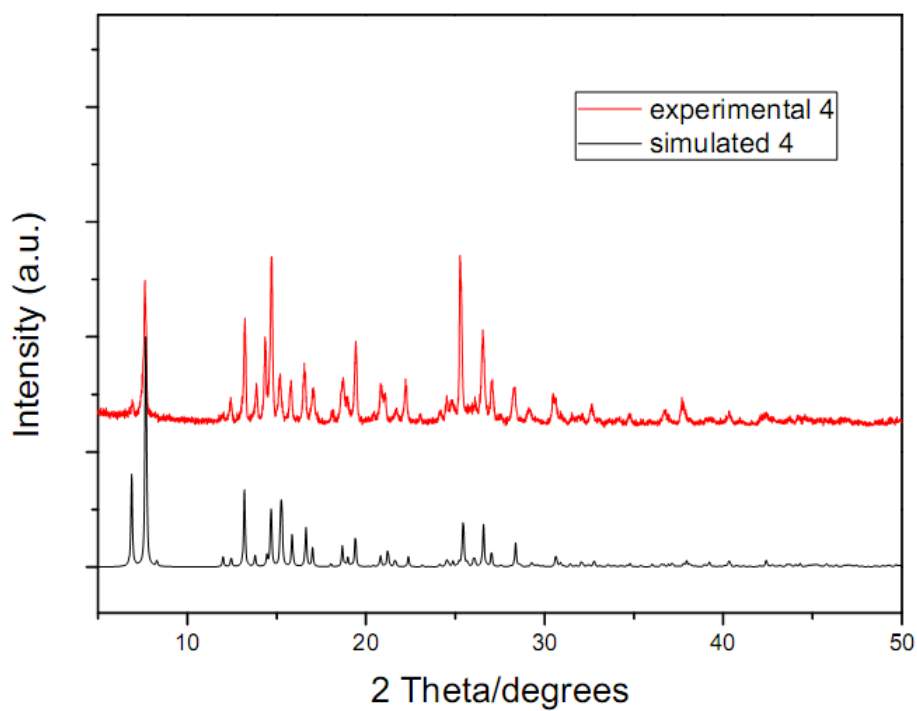

Figure S6. PXRD analysis for compound 4

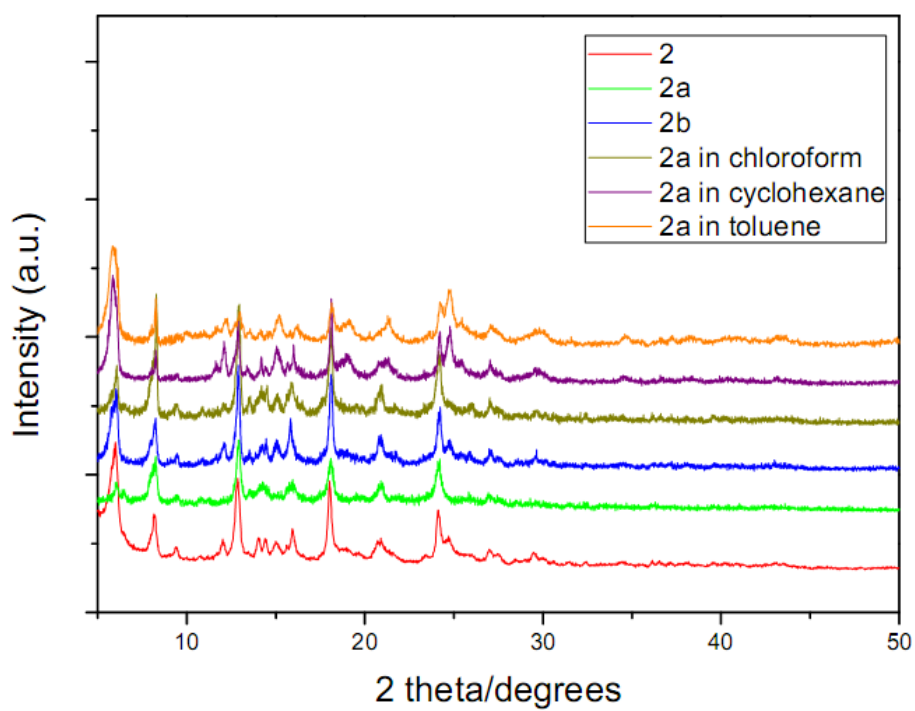

Figure S7. PXRD analyses for 2, 2a, 2b, 2a samples soaked in chloroform, cyclohexane, and toluene.

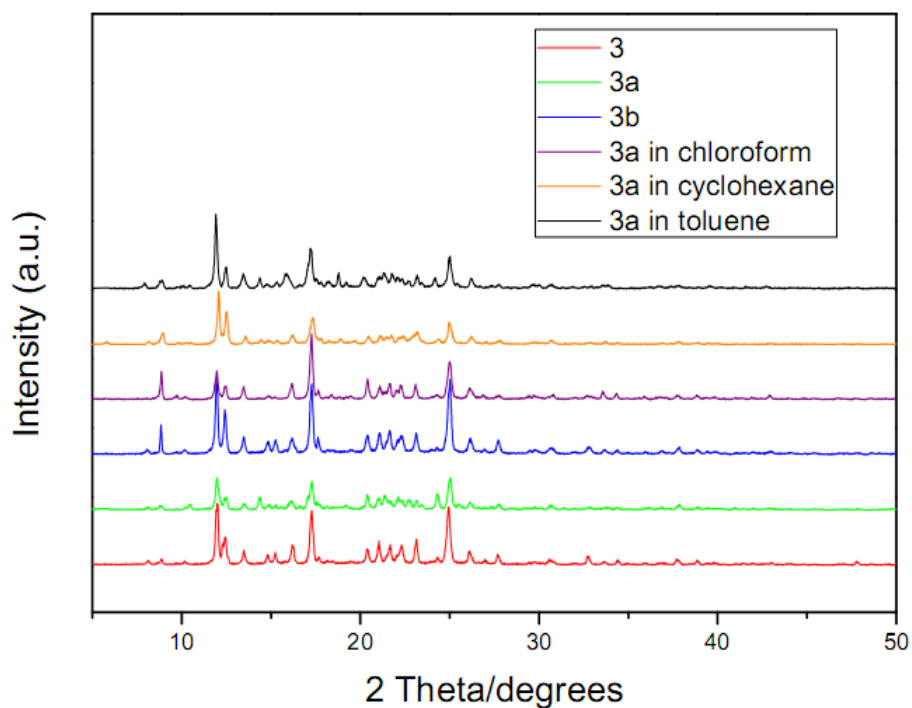

Figure S8. PXRD analyses for **3**, **3a**, **3b**, **3a** samples soaked in chloroform, cyclohexane, and toluene.

### Optical Microscope Images of Compound 1 Crystals

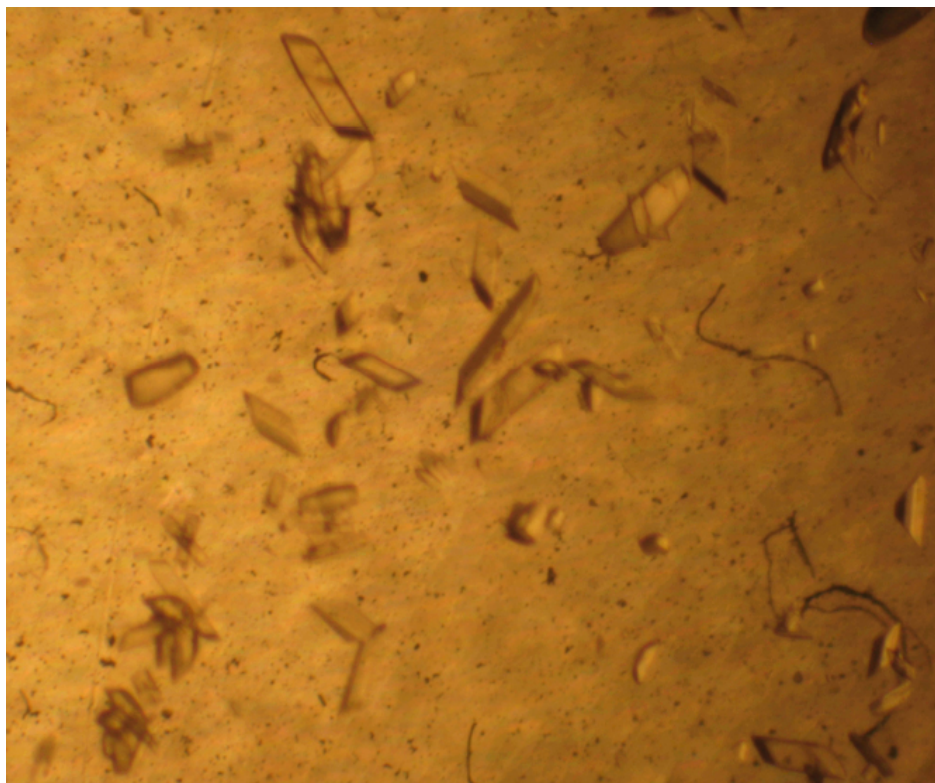

Figure S9. Optical image of compound **1**

The crystals of Compound 1 are stable inside their mother liquor. They are moisture sensitive and



decompose within few minutes. We could not get their accurate PXRD patterns.

### Semilogarithmic emission decay plots of the free H<sub>2</sub>L ligand and compound 1-4

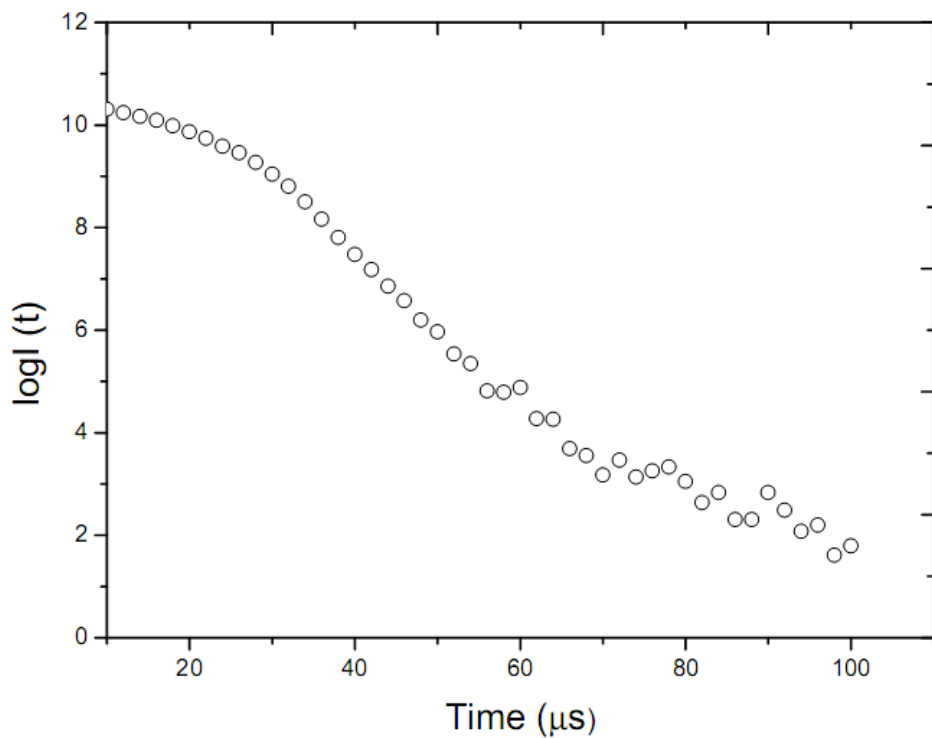

Figure S10. Semilogarithmic emission decay plots of free H<sub>2</sub>L ligand.

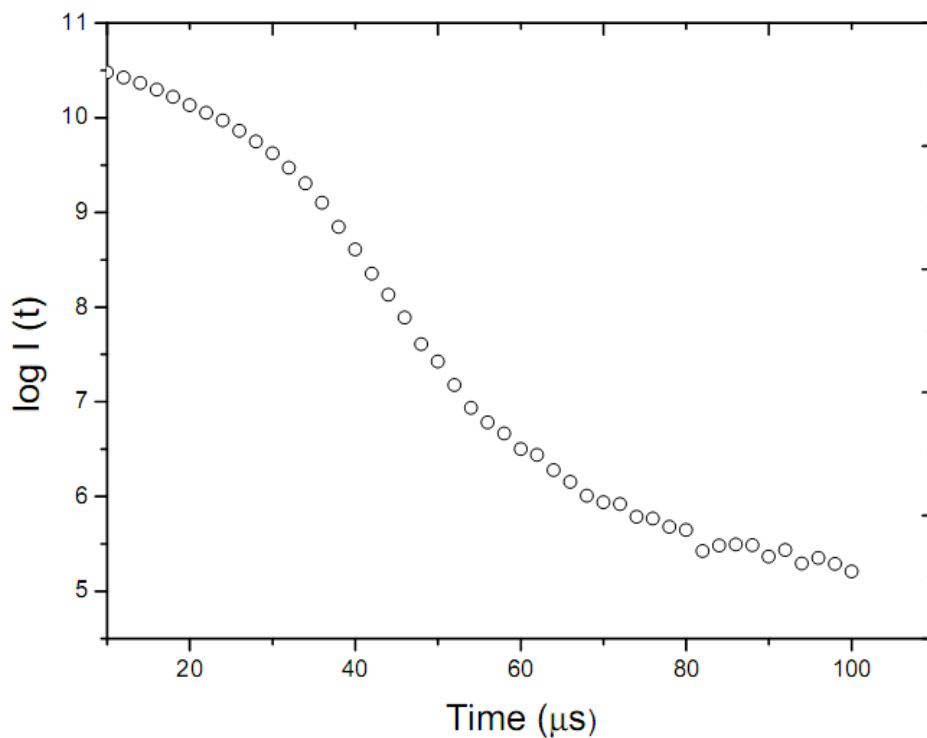

Figure S11. Semilogarithmic emission decay plots of compound 1.

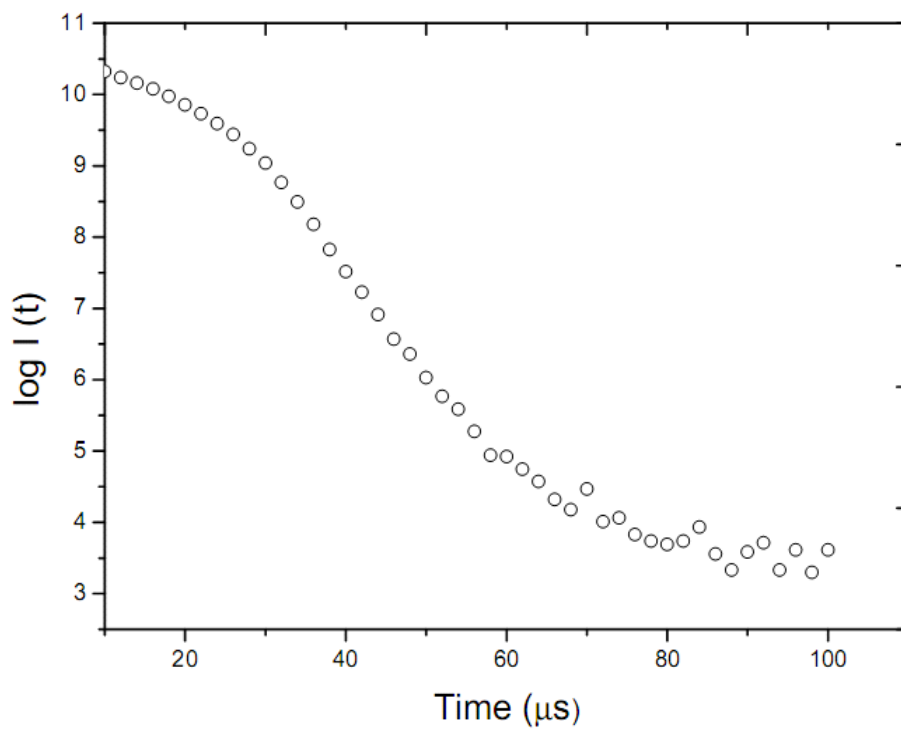

Figure S12. Semilogarithmic emission decay plots of compound 2.

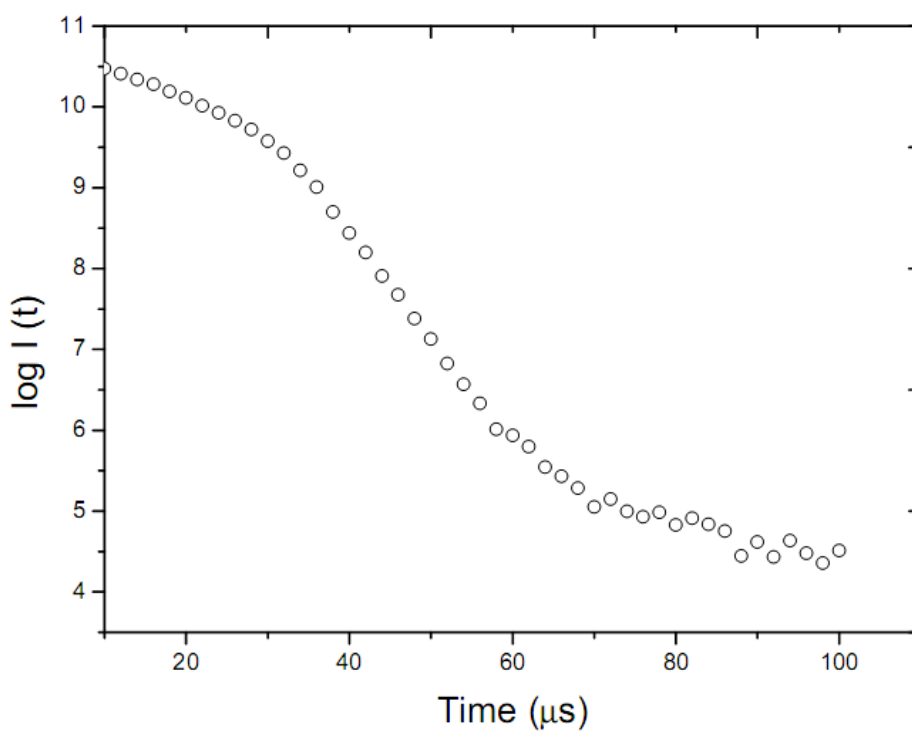

Figure S13. Semilogarithmic emission decay plots of compound 3.

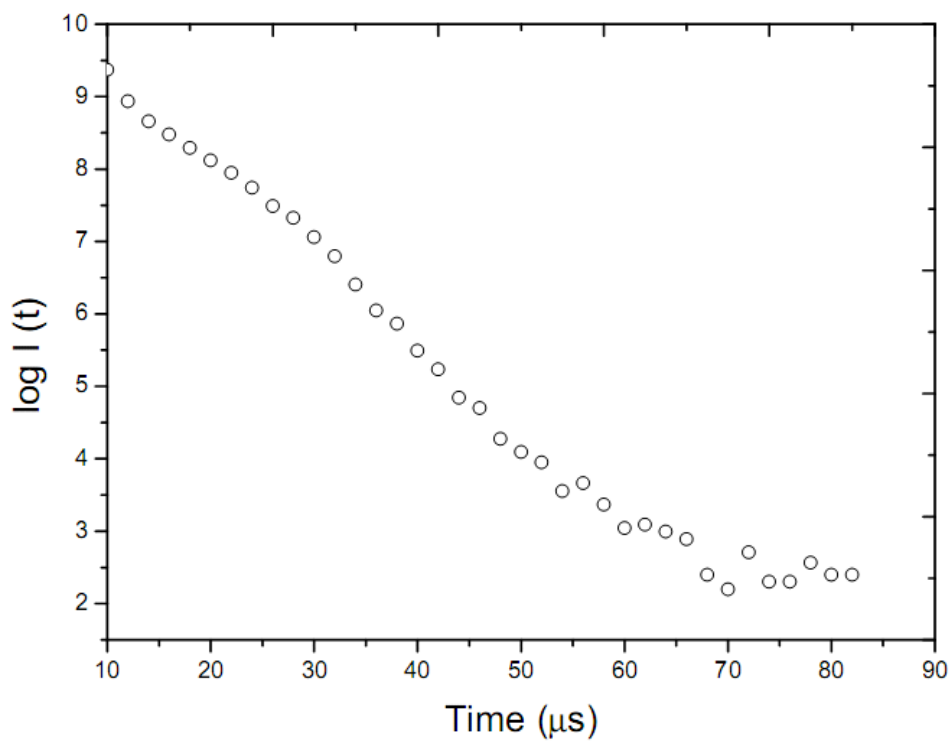

Figure S14. Semilogarithmic emission decay plots of compound 4.
